# Supplementary material for: Hydrothermal preparation of WO3 nanorod array and ZnO nanosheet array composite structures on FTO substrates with enhanced photocatalytic properties
Source: Royal Society of Chemistry journal article supplement (doi:10.1039/c5tc01125f), 2015-01-01
Supplement: c5tc01125f1.pdf [file c5tc01125f1.pdf]

## Electronic Supplementary Information

### Hydrothermal preparation of WO<sub>3</sub> nanorod arrays and ZnO nanosheet arrays composite structures on FTO substrates with enhanced photocatalytic properties

Feng Zheng<sup>a,b,c</sup>, Hui Lu<sup>a</sup>, Min Guo<sup>\*,a</sup>, Mei Zhang<sup>a</sup>, Qiang Zhen<sup>b,c</sup>

Fig. S1 shows the XRD pattern of the WO<sub>3</sub> seed layers pre-coated on FTO substrate. The orientation of the seeds can be divided into two kinds: parallel to substrate such as [200], [420] directions and non-parallel to substrate such as [202], [222] directions.

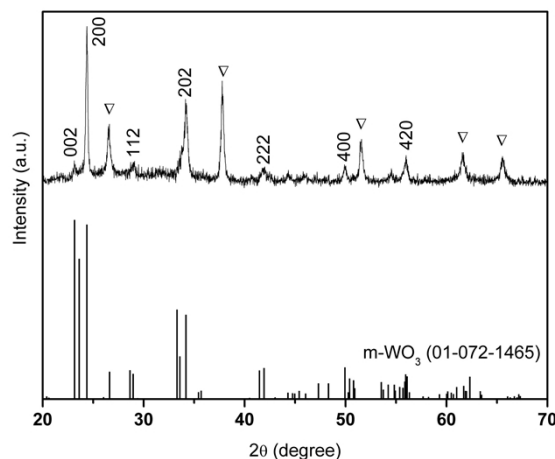

Fig. S1 XRD pattern of the WO<sub>3</sub> seed layers pre-coated on FTO substrate.

<sup>a</sup> State Key Laboratory of Advanced Metallurgy, School of Metallurgical and Ecological Engineering, University of Science and Technology Beijing, Beijing 100083, P. R. China

<sup>b</sup> Materials Science and Engineering college, Shanghai University, Shanghai 200444, P. R. China

<sup>c</sup> Nano-science and Nano-technology Research Center, School of Materials Science and Engineering, Shanghai University, Shanghai 200444, P.R. China

\* E-mail: guomin@ustb.edu.cn, Fax: +86 10 62334926

Fig. S2 shows the morphology of unchin-like  $\text{WO}_3$  nanorod arrays and the corresponding heterostructures by adjusting the hydrothermal reaction times of preparation of  $\text{WO}_3$  nanorod arrays (4 h) and ZnO nanosheet arrays (1.5 h).

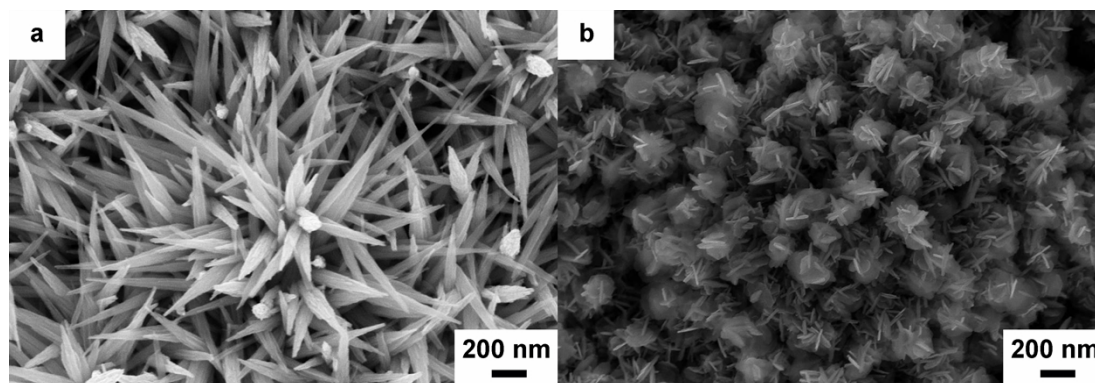

Fig. S2 SEM images of (a) unchin-like nanorod arrays and (b) corresponding composite structures.

Fig. S3 shows the morphologies of the primary structure of ZnO nanorod arrays grown on FTO substrate and hierarchical structure of ZnO nanorods grown on the primary structure under the hydrothermal conditions mentioned in the experimental (section 2.3).

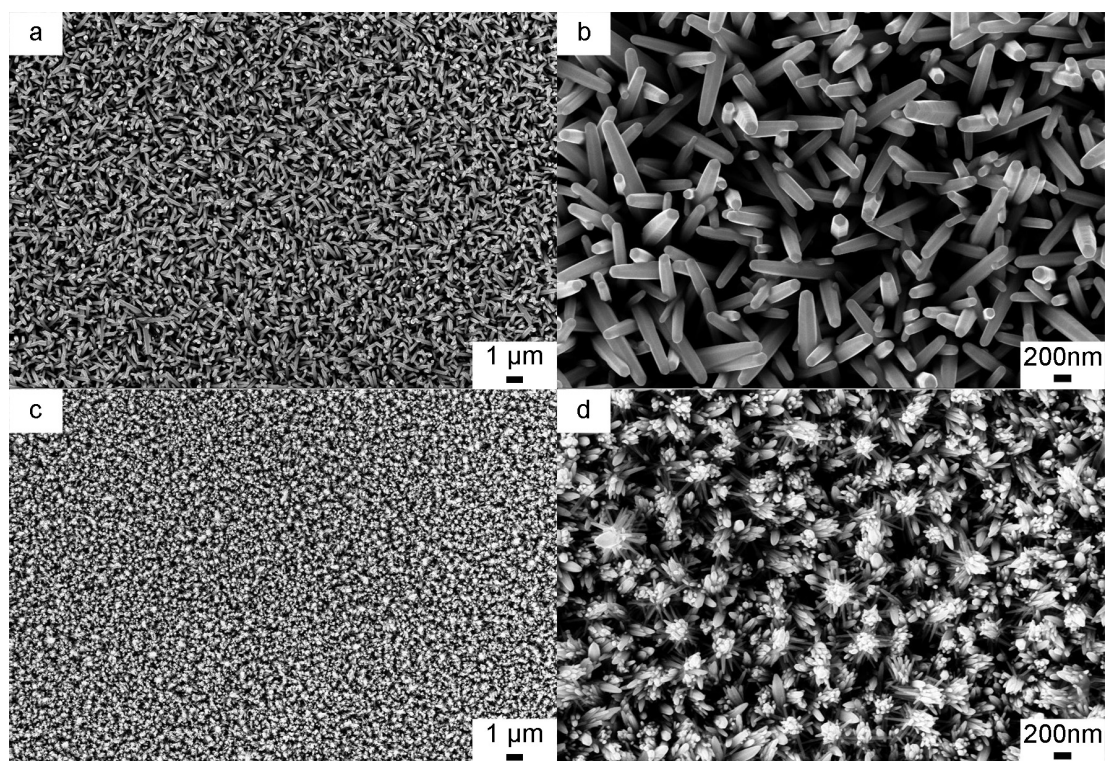

Fig. S3 SEM images of the primary structure of ZnO nanorod arrays grown on FTO substrate (a) with low magnification and (b) with high magnification. SEM images of the ZnO nanorods- ZnO nanorods hierarchical structure (c) with low magnification and (d) with high magnification.

Fig. S4 shows the effect of the active species during photocatalytic degradation. 1.0 mM isopropanol and 1.0 mM benzoquinone are added to scavenge  $\text{OH}\cdot$  and  $\text{O}_2^-$ , respectively. Then the degradation efficiencies in 60 min are decreased significantly, which means that the active  $\text{OH}\cdot$  and  $\text{O}_2^-$  play important roles in photocatalytic degradation.

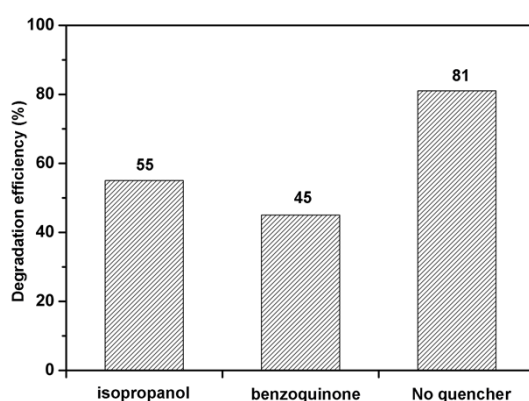

Fig. S4 The degradation efficiencies of methyl blue during photo-degradation under the addition of different scavengers.
